# Supplementary material for: Phenotypic and functional characterization of T cells in white matter lesions of multiple sclerosis patients
Source: PubMed Central journal article supplement (PMC5563341; doi:10.1007/s00401-017-1744-4), 2017-06-17
Supplement: 401_2017_1744_MOESM1_ESM.pdf [file 401_2017_1744_MOESM1_ESM.pdf]

**Online Resource 1. General characteristics of multiple sclerosis patients and white matter brain tissues obtained for *ex vivo* and *in vitro* T-cell analyses.**

| Patient ID | Clinical course <sup>a</sup> | Gender <sup>b</sup> | Age (yrs) | Disease duration   |                   | Cause of death                          | CSF (pH) | PMI (hrs) <sup>e</sup> | IHC of viable tissues <sup>f</sup> |           | HLA class I <sup>g</sup> |                 |                 | HLA class II <sup>g</sup> |                 |
|------------|------------------------------|---------------------|-----------|--------------------|-------------------|-----------------------------------------|----------|------------------------|------------------------------------|-----------|--------------------------|-----------------|-----------------|---------------------------|-----------------|
|            |                              |                     |           | (yrs) <sup>c</sup> | EDSS <sup>d</sup> |                                         |          |                        | NAWM                               | Lesion(s) | A                        | B               | C               | DRB1                      | DQB1            |
| 1          | SPMS                         | F                   | 64        | 31                 | ≥8                | Urosepsis                               | 6.20     | 10:10                  | NAWM                               | mAIL      | <u>*02, *03</u>          | <u>*07, *51</u> | <u>*02, *07</u> | <u>*11, *15</u>           | <u>*03, *06</u> |
| 2          | PPMS                         | F                   | 88        | 25                 | 6-7               | Exhaustion by chronic colitis ulcerosis | 6.85     | 7:55                   | NAWM                               | mAIL      | <u>*01, *02</u>          | <u>*07, *38</u> | <u>*07, *12</u> | <u>*15, *15</u>           | <u>*06, *06</u> |
| 3          | SPMS                         | M                   | 45        | 10                 | ≥8                | Pulmonary embolisms and cardiac arrest  | 6.22     | 7:45                   | n.a.                               | mAIL      | <u>*01, *01</u>          | <u>*07, *08</u> | <u>*07, *07</u> | <u>*03, *15</u>           | <u>*02, *06</u> |
| 4          | SPMS                         | M                   | 76        | 44                 | ≥8                | Cerebrovascular incident                | 6.42     | 7:35                   | NAWM                               | DWMA      | <u>*01, *26</u>          | <u>*27, *37</u> | <u>*01, *06</u> | <u>*10, *16</u>           | <u>*05, *05</u> |
| 5          | RRMS                         | F                   | 59        | 24                 | 7-8               | Euthanasia                              | 7.08     | 4:45                   | DWMA                               | AL        | <u>*11, *24</u>          | <u>*35, *52</u> | <u>*03, *12</u> | <u>*01, *13</u>           | <u>*05, *06</u> |
| 6          | SPMS                         | F                   | 68        | 37                 | ≥8                | Euthanasia                              | 6.40     | 10:20                  | mAIL                               | mAIL      | <u>*02, *68</u>          | <u>*14, *57</u> | <u>*06, *08</u> | <u>*13, *15</u>           | <u>*03, *06</u> |
| 7          | PPMS                         | M                   | 83        | 21                 | n.d.              | Pneumonia and lung cancer               | 6.40     | 7:50                   | DWMA                               | mAIL      | <u>*02, *29</u>          | <u>*40, *45</u> | <u>*03, *06</u> | <u>*12, *13</u>           | <u>*03, *06</u> |
| 8          | SPMS                         | F                   | 74        | 25                 | ≥8                | Cardio-respiratory insufficiency        | 6:43     | 10:15                  | NAWM                               | IL        | <u>*03, *03</u>          | <u>*07, *44</u> | <u>*07, *16</u> | <u>*07, *15</u>           | <u>*02, *06</u> |
| 9          | PPMS                         | M                   | 54        | 12                 | 7-8               | Euthanasia                              | 6.39     | 8:15                   | n.a.                               | 2xmAIL    | <u>*11, *29</u>          | <u>*35, *44</u> | <u>*04, *16</u> | <u>*01, *15</u>           | <u>*02, *06</u> |
| 10         | PPMS                         | F                   | 66        | 23                 | ≥8                | Euthanasia                              | 6.45     | 9:35                   | NAWM                               | mAIL      | n.d.                     | n.d.            | n.d.            | n.d.                      | n.d.            |
| 11         | SPMS                         | F                   | 56        | 32                 | ≥8                | Pneumonia                               | 6.16     | 8:25                   | n.a.                               | AL        | n.d.                     | n.d.            | n.d.            | n.d.                      | n.d.            |
| 12         | RRMS                         | M                   | 56        | 13                 | 7-8               | Suicide                                 | 7.10     | 10:10                  | DWMA                               | DWMA      | n.d.                     | n.d.            | n.d.            | n.d.                      | n.d.            |
| 13         | SPMS                         | M                   | 73        | 43                 | ≥8                | Urosepsis                               | 6.40     | 8:45                   | NAWM                               | IL        | n.d.                     | n.d.            | n.d.            | n.d.                      | n.d.            |
| 14         | PPMS                         | F                   | 54        | 31                 | ≥8                | Heart Failure                           | 6.27     | 9:20                   | DWMA                               | IL        | n.d.                     | n.d.            | n.d.            | n.d.                      | n.d.            |
| 15         | SPMS                         | M                   | 54        | 25                 | ≥8                | Euthanasia                              | 6.26     | 10:50                  | DWMA                               | mAIL      | n.d.                     | n.d.            | n.d.            | n.d.                      | n.d.            |
| 16         | SPMS                         | F                   | 95        | 54                 | ≥8                | Infection, cachexia and dehydration     | 6.40     | 10:00                  | NAWM                               | AL        | n.d.                     | n.d.            | n.d.            | n.d.                      | n.d.            |
| 17         | n.d.                         | M                   | 71        | 15                 | 6.5               | Metastasized pulmonary carcinoma        | 6.38     | 8:45                   | n.a.                               | n.d.      | <u>*01, *02</u>          | <u>*07, *07</u> | <u>*07, *07</u> | n.d.                      | n.d.            |
| 18         | SPMS                         | M                   | 59        | 21                 | 7                 | Euthanasia                              | 6.50     | 10:45                  | DWMA                               | mAIL      | n.d.                     | n.d.            | n.d.            | n.d.                      | n.d.            |
| 19         | SPMS                         | F                   | 53        | 16                 | 7-8               | Euthanasia                              | 6.81     | 7:15                   | DWMA                               | DWMA      | <u>*02, *03</u>          | <u>*07, *35</u> | <u>*04, *07</u> | <u>*01, *15</u>           | <u>*05, *06</u> |
| 20         | RRMS                         | F                   | 87        | 18                 | ≥8                | Dehydration and renal insufficiency     | 5.92     | 9:30                   | NAWM                               | DWMA      | <u>*02, *02</u>          | <u>*15, *44</u> | <u>*03, *07</u> | <u>*15, *15</u>           | <u>*06, *06</u> |
| 21         | SPMS                         | F                   | 48        | 22                 | ≥8                | Respiratory failure                     | 6.10     | 11:50                  | NAWM                               | mAIL      | <u>*01, *11</u>          | <u>*15, *52</u> | <u>*03, *12</u> | <u>*04, *11</u>           | <u>*03, *03</u> |
| 22         | PPMS                         | M                   | 66        | 25                 | ≥8                | Euthanasia                              | 7.28     | 10:55                  | mAIL                               | AL        | <u>*02, *03</u>          | <u>*07, *15</u> | <u>*03, *07</u> | <u>*15, *15</u>           | <u>*06, *06</u> |
| 23         | PPMS                         | M                   | 57        | 25                 | 6.5               | Sepsis                                  | 6.80     | 10:15                  | NAWM                               | mAIL      | n.d.                     | n.d.            | n.d.            | n.d.                      | n.d.            |
| 24         | SPMS                         | F                   | 56        | 21                 | 6.5               | Suicide                                 | 6.42     | 14:00                  | n.d.                               | n.d.      | <u>*24, *30</u>          | <u>*18, *40</u> | <u>*03, *05</u> | n.d.                      | n.d.            |
| 25         | PPMS                         | F                   | 51        | 15                 | ≥8                | Euthanasia                              | 6.60     | 9:45                   | n.d.                               | n.d.      | n.d.                     | n.d.            | n.d.            | n.d.                      | n.d.            |
| 26         | n.d.                         | F                   | 35        | 10                 | ≥8                | Euthanasia                              | 6.37     | 10:20                  | n.d.                               | n.d.      | n.d.                     | n.d.            | n.d.            | n.d.                      | n.d.            |
| 27         | SPMS                         | F                   | 74        | 50                 | >7.5              | Euthanasia                              | 6.40     | 7:50                   | NAWM                               | mAIL      | n.d.                     | n.d.            | n.d.            | n.d.                      | n.d.            |

<sup>a</sup>RR, relapsing remitting MS; PP, primary progressive MS; SP, secondary progressive MS; Und., undefined disease course. <sup>b</sup>Gender: Male or Female, <sup>c</sup>Duration disease since clinical diagnosis of MS. <sup>d</sup>Expanded disability status scale. <sup>e</sup>Post-mortem interval: time between death and the end of autopsy. <sup>f</sup>Macroscopically characterized normal appearing white matter (NAWM) and MS lesion tissues obtained were subjected to immunohistochemistry (IHC) to classify WM as: NAWM, diffuse white matter abnormalities (DWMA), active lesion (AL), mixed active/inactive lesion (mAIL) and inactive lesion (IL) (see reference 29). n.a., not available; n.d., not determined. <sup>g</sup>HLA genotypes overlapping with BLCL-GR (HLA-A\*01,\*03, -B\*07,\*27, -C\*02,\*07, -DRB1\*13,\*15, -DQB1\*06,\*06) are underlined.
