# Supplementary material for: Phenotypic and functional characterization of T cells in white matter lesions of multiple sclerosis patients
Source: PubMed Central journal article supplement (PMC5563341; doi:10.1007/s00401-017-1744-4), 2017-06-17
Supplement: 401_2017_1744_MOESM2_ESM.pdf [file 401_2017_1744_MOESM2_ESM.pdf]

**Online Resource 2. General characteristics of multiple sclerosis patients and white matter brain tissues obtained for *in situ* T-cell analyses.**

| Patient ID <sup>a</sup> | Clinical course <sup>b</sup> | Gender <sup>c</sup> | Age (yrs) | Disease duration (yrs) <sup>d</sup> | EDSS <sup>e</sup> | Cause of death           | CSF (pH) <sup>f</sup> | PMI (hrs) <sup>g</sup> | IHC of FFPE tissue(s) <sup>h</sup> |
|-------------------------|------------------------------|---------------------|-----------|-------------------------------------|-------------------|--------------------------|-----------------------|------------------------|------------------------------------|
| S99/128                 | PPMS                         | M                   | 74        | 40                                  | ≥8                | Resiratory insufficiency | 6.91                  | 8:30                   | IL                                 |
| S00/274                 | SPMS                         | M                   | 64        | 34                                  | ≥8                | End stage MS             | 6.84                  | 7:30                   | AL                                 |
| S02/052                 | SPMS                         | F                   | 75        | 34                                  | 7-8               | Pneumonia                | 6.40                  | 8:00                   | IL                                 |
| S06/054                 | PPMS                         | F                   | 44        | 6                                   | ≥8                | Decompensation           | 6.34                  | 10:15                  | IL                                 |
| S06/139                 | SPMS                         | M                   | 56        | 21                                  | ≥8                | Pneumonia                | 6.65                  | 8:00                   | mAIL                               |
| S07/216                 | SPMS                         | M                   | 71        | 26                                  | ≥8                | Pneumonia                | 6.60                  | 7:00                   | mAIL                               |
| S09/251                 | SPMS                         | M                   | 75        | 39                                  | 6.5               | Euthanasia               | 6.53                  | 7:45                   | mAIL                               |
| S10/020 (#6)            | SPMS                         | F                   | 68        | 37                                  | ≥8                | Euthanasia               | 6.40                  | 10:20                  | DWMA, AL & mAIL                    |
| S11/080 (#11)           | SPMS                         | F                   | 56        | 32                                  | ≥8                | Pneumonia                | 6.16                  | 8:25                   | mAIL                               |
| S12/008                 | SPMS                         | F                   | 66        | 17                                  | ≥8                | Pulmonary hypertension   | 6.73                  | 10:45                  | AL                                 |

<sup>a</sup>Patient number as assigned by the Netherlands Brain Bank (#6 and #11 refer to patient ID in Online Resource 1).

<sup>b</sup>RR, relapsing remitting MS; PP, primary progressive MS; SP, secondary progressive MS; Und., undefined disease course.

<sup>c</sup>Gender: Male or Female.

<sup>d</sup>Duration disease since clinical diagnosis of MS.

<sup>e</sup>Expanded disability status scale.

<sup>f</sup>CSF, cerebrospinal fluid.

<sup>g</sup>Post-mortem interval: time between death and the end of autopsy.

<sup>h</sup>Formalin-fixed and paraffin-embedded (FFPE) white matter lesion tissues were characterized by immunohistochemistry (IHC) to classify the sampled WML as: diffuse white matter abnormality (DWMA), active lesion (AL), mixed active/inactive lesion (IAL) and inactive lesion (IL) (see reference 29).
