# Supplementary material for: Phenotypic and functional characterization of T cells in white matter lesions of multiple sclerosis patients
Source: PubMed Central journal article supplement (PMC5563341; doi:10.1007/s00401-017-1744-4), 2017-06-17
Supplement: 401_2017_1744_MOESM3_ESM.pdf [file 401_2017_1744_MOESM3_ESM.pdf]

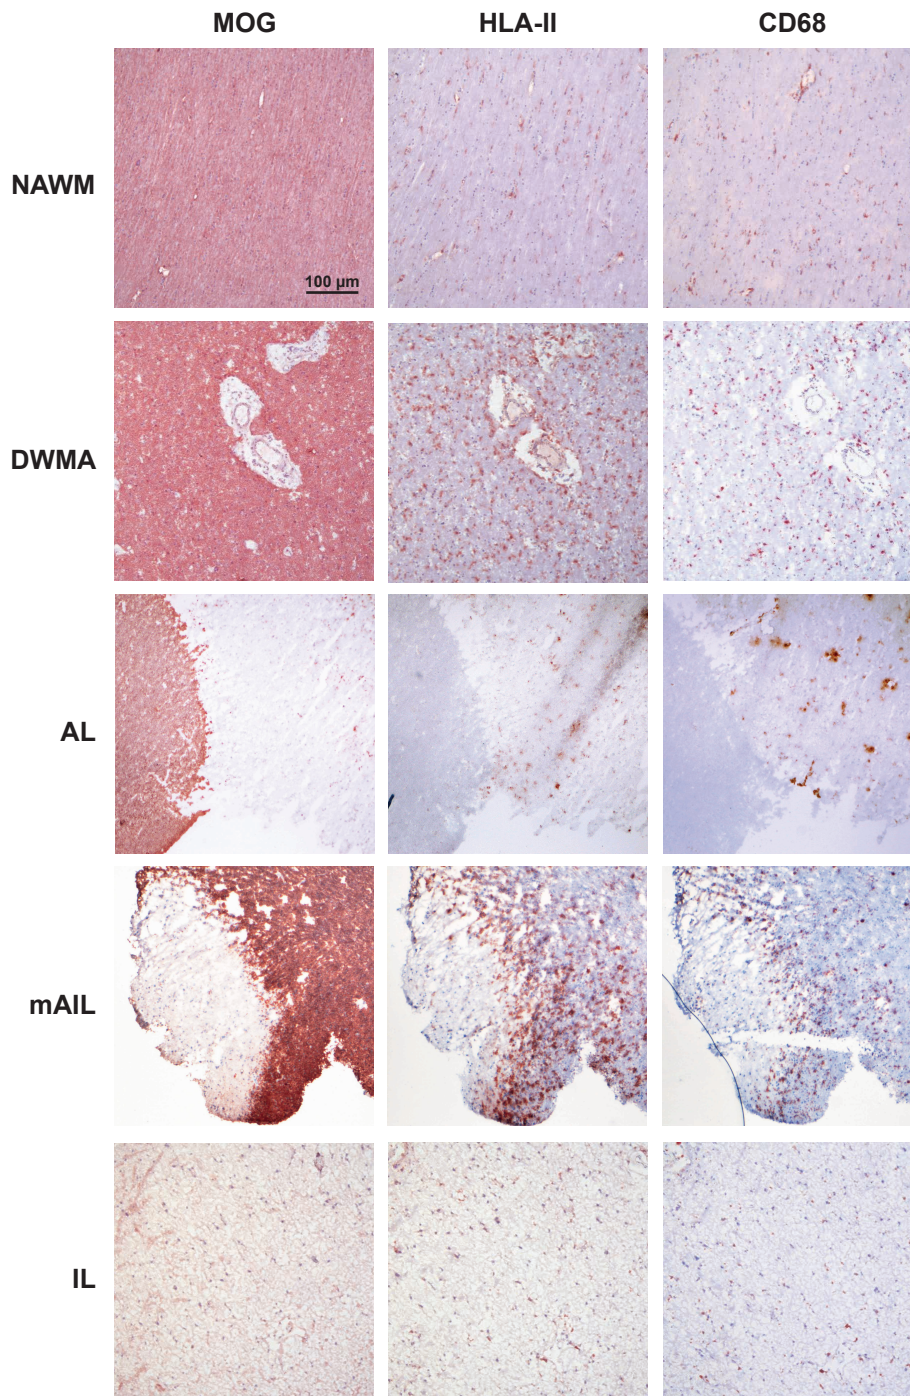

**Online Resource 3. Examples of distinct white matter phenotypes of MS patients.**

Representative examples of MS white matter stainings according to Kuhlmann et al., *Acta Neuropathol* (2017) [29]. We used myelin oligodendrocyte glycoprotein (MOG), HLA class II (HLA-II) and CD68, expressed by macrophages and microglia, as markers to discriminate normal appearing white matter (NAWM: HLA-II<sup>+/−</sup>Myelin<sup>+</sup>CD68<sup>+/−</sup>), diffuse white matter abnormalities (DWMA: HLA-II<sup>++</sup>Myelin<sup>+</sup>CD68<sup>+</sup>), active lesions (AL: HLA-II<sup>++</sup>Myelin<sup>+/−</sup>CD68<sup>+</sup>), mixed active/inactive lesions (mAIL; hypercellular rim: HLA-II<sup>++</sup>Myelin<sup>+/−</sup>CD68<sup>++</sup> and hypocellular center: HLA-II<sup>+/−</sup>Myelin<sup>−</sup>CD68<sup>+/−</sup>) and inactive lesions (IL: hypocellular: HLA-II<sup>+/−</sup>Myelin<sup>−</sup>CD68<sup>+/−</sup>) in consecutive 8 μm sections of snap-frozen MS brain tissues. Scale bar is indicated in top left image.
