# Supplementary material for: Phenotypic and functional characterization of T cells in white matter lesions of multiple sclerosis patients
Source: Springer Nature journal article supplement (doi:10.1007/s00401-017-1744-4), 2017-06-17
Supplement: MOESM5 [file 12451212]

|                          |           | Paired WML and NAWM |           |          |           |           |           |           |           | Paired WML and WML |           |          |       |    |      |            |       |            |       |     |      |
|--------------------------|-----------|---------------------|-----------|----------|-----------|-----------|-----------|-----------|-----------|--------------------|-----------|----------|-------|----|------|------------|-------|------------|-------|-----|------|
| Patient                  |           | #2                  |           | #8       |           | #21       |           | #23       |           | #5                 |           | #6       |       | #7 |      | #9         |       | #19        |       | #22 |      |
| PB healthy donors        |           | mAIL                | NAWM      | IL       | NAWM      | mAIL      | NAWM      | mAIL      | NAWM      | AL                 | DWMA      | mAIL1    | mAIL2 | AL | DWMA | mAIL1      | mAIL2 | DWMA1      | DWMA2 | AL  | mAIL |
| CD4 <sup>+</sup> T-cells | TCRVβ1    | 3.3                 | 0.1 0.0   | 0.1 0.2  | 0.0 0.0   | 0.1 1.6   | 3.5 5.0   | 6.6 5.2   | 0.7 0.6   | 3.0 6.5            | 0.6 0.9   | 0.0 1.5  |       |    |      |            |       |            |       |     |      |
|                          | TCRVβ2    | 9.4                 | 1.3 0.1   | 14.4 2.8 | 45.3 0.2  | 0.2 13.0  | 6.2 3.3   | 5.9 0.0   | 15.8 3.6  | 24.4 16.1          | 14.4 9.0  | 1.2 4.1  |       |    |      |            |       |            |       |     |      |
|                          | TCRVβ3    | 4.4                 | 0.1 12.5  | 0.1 9.8  | 0.0 0.0   | 3.1 0.4   | 0.2 0.0   | 0.0 3.1   | 3.8 3.6   | 2.6 2.6            | 2.4 1.1   | 0.6 1.7  |       |    |      |            |       |            |       |     |      |
|                          | TCRVβ4    | 2.0                 | 0.0 52.0  | 0.0 0.0  | 0.0 0.0   | 0.0 0.3   | 2.0 0.0   | 0.0 0.0   | 0.0 0.0   | 0.1 0.0            | 6.7 0.0   | 0.0 0.0  |       |    |      |            |       |            |       |     |      |
|                          | TCRVβ5.1  | 6.7                 | 0.0 0.1   | 3.4 0.5  | 0.0 23.8  | 0.0 0.4   | 1.3 2.8   | 0.0 0.0   | 5.4 1.5   | 0.1 0.1            | 0.0 1.7   | 0.4 11.9 |       |    |      |            |       |            |       |     |      |
|                          | TCRVβ5.2  | 1.3                 | 0.0 0.0   | 0.5 1.5  | 0.0 0.0   | 0.0 0.0   | 1.5 0.5   | 0.6 0.0   | 0.7 0.3   | 0.3 1.8            | 0.1 1.7   | 0.4 0.2  |       |    |      |            |       |            |       |     |      |
|                          | TCRVβ5.3  | 1.1                 | 0.1 0.0   | 0.2 0.5  | 0.2 0.0   | 0.0 0.0   | 0.7 0.0   | 0.2 0.0   | 0.2 3.6   | 1.8 0.6            | 0.0 0.2   | 0.3 0.0  |       |    |      |            |       |            |       |     |      |
|                          | TCRVβ7.1  | 1.9                 | 0.0 0.0   | 3.7 2.1  | 0.0 0.0   | 23.0 0.0  | 1.3 0.0   | 0.0 0.0   | 0.6 0.8   | 0.7 0.2            | 2.1 4.7   | 0.3 0.1  |       |    |      |            |       |            |       |     |      |
|                          | TCRVβ7.2  | 1.1                 | 0.0 0.0   | 0.3 0.0  | 0.0 0.0   | 0.1 0.0   | 0.8 0.0   | 2.0 0.1   | 0.0 0.2   | 0.1 0.0            | 0.0 2.2   | 0.6 4.3  |       |    |      |            |       |            |       |     |      |
|                          | TCRVβ8    | 4.8                 | 1.6 0.0   | 6.0 0.1  | 25.7 0.0  | 0.4 1.3   | 1.0 11.8  | 0.2 0.1   | 1.9 1.0   | 3.8 4.7            | 4.3 0.9   | 1.0 1.0  |       |    |      |            |       |            |       |     |      |
|                          | TCRVβ9    | 4.1                 | 0.0 0.0   | 11.5 0.0 | 17.1 0.5  | 6.8 0.0   | 4.6 0.0   | 0.4 0.2   | 0.6 6.9   | 2.1 2.7            | 0.8 0.0   | 0.4 0.0  |       |    |      |            |       |            |       |     |      |
|                          | TCRVβ11   | 0.9                 | 0.3 0.8   | 0.2 0.2  | 0.3 0.8   | 0.5 0.3   | 0.4 0.1   | 0.3 0.2   | 0.3 0.1   | 0.3 0.1            | 0.3 0.1   | 1.2 0.2  |       |    |      |            |       |            |       |     |      |
|                          | TCRVβ12   | 1.8                 | 0.1 9.6   | 0.2 1.3  | 0.1 0.0   | 0.1 0.0   | 1.6 0.0   | 0.0 0.0   | 1.3 2.4   | 0.4 1.9            | 0.3 0.2   | 0.0 0.3  |       |    |      |            |       |            |       |     |      |
|                          | TCRVβ13.1 | 4.0                 | 0.0 1.0   | 33.4 0.3 | 0.9 2.1   | 0.8 21.3  | 11.9 0.4  | 0.6 0.1   | 1.6 1.2   | 0.7 1.7            | 0.6 1.0   | 2.1 3.4  |       |    |      |            |       |            |       |     |      |
|                          | TCRVβ13.2 | 2.8                 | 0.0 0.2   | 0.2 2.8  | 0.0 0.1   | 0.0 15.5  | 1.6 10.8  | 0.4 0.1   | 0.3 0.6   | 0.4 0.4            | 2.5 0.2   | 0.0 1.4  |       |    |      |            |       |            |       |     |      |
|                          | TCRVβ13.6 | 1.9                 | 62.7 9.8  | 0.5 0.4  | 0.0 0.0   | 0.0 4.1   | 10.3 5.6  | 2.2 0.0   | 0.9 1.0   | 3.4 0.1            | 4.4 1.1   | 0.0 1.0  |       |    |      |            |       |            |       |     |      |
|                          | TCRVβ14   | 2.6                 | 2.3 0.0   | 0.1 0.0  | 0.0 6.9   | 2.0 0.0   | 0.2 3.1   | 7.3 0.0   | 2.6 5.5   | 1.8 1.9            | 0.2 0.0   | 0.6 1.1  |       |    |      |            |       |            |       |     |      |
|                          | TCRVβ16   | 1.0                 | 0.0 0.0   | 0.0 1.1  | 0.0 0.0   | 1.3 0.0   | 3.7 1.3   | 0.3 0.1   | 0.2 8.0   | 0.7 0.0            | 0.5 0.0   | 0.4 0.0  |       |    |      |            |       |            |       |     |      |
|                          | TCRVβ17   | 5.5                 | 0.1 0.1   | 1.7 3.1  | 0.0 0.0   | 0.9 1.7   | 1.3 0.7   | 5.7 0.0   | 3.7 2.0   | 5.2 10.2           | 1.8 2.6   | 0.0 4.9  |       |    |      |            |       |            |       |     |      |
|                          | TCRVβ18   | 1.9                 | 0.1 0.1   | 0.2 0.0  | 3.8 0.0   | 0.0 0.7   | 0.2 0.2   | 0.2 0.0   | 0.2 0.3   | 0.1 0.2            | 0.0 0.2   | 0.0 0.2  |       |    |      |            |       |            |       |     |      |
|                          | TCRVβ20   | 2.6                 | 0.1 4.9   | 0.3 0.1  | 1.7 54.6  | 30.3 0.0  | 2.7 10.4  | 9.5 0.0   | 0.2 1.4   | 7.7 19.0           | 1.9 11.6  | 62.9 0.4 |       |    |      |            |       |            |       |     |      |
|                          | TCRVβ21.3 | 2.5                 | 0.0 0.0   | 0.0 0.1  | 0.0 0.0   | 0.0 0.6   | 0.7 0.4   | 0.1 0.8   | 4.7 2.3   | 0.7 1.3            | 2.3 5.8   | 0.0 0.0  |       |    |      |            |       |            |       |     |      |
|                          | TCRVβ22   | 4.3                 | 0.0 0.0   | 0.1 0.1  | 0.0 0.7   | 0.0 3.0   | 1.0 1.9   | 0.6 62.2  | 1.6 5.1   | 1.8 3.7            | 0.3 1.6   | 0.0 8.1  |       |    |      |            |       |            |       |     |      |
|                          | TCRVβ23   | 0.5                 | 0.0 0.0   | 0.0 0.0  | 0.0 0.0   | 0.2 0.0   | 0.1 0.3   | 0.0 0.0   | 0.0 0.0   | 0.1 0.0            | 0.0 0.0   | 0.3 0.0  |       |    |      |            |       |            |       |     |      |
| undetermined             | 27.8      | 11.0 8.9            | 22.9 73.0 | 4.8 10.1 | 30.2 35.9 | 41.4 41.5 | 57.0 27.6 | 52.8 48.2 | 37.8 24.4 | 53.4 48.0          | 7.3 54.3  |          |       |    |      |            |       |            |       |     |      |
|                          |           |                     |           |          |           |           |           |           |           |                    |           |          |       |    |      | r = 0.50   |       | r = 0.79   |       |     |      |
|                          |           |                     |           |          |           |           |           |           |           |                    |           |          |       |    |      | p = 0.01   |       | p = 0.0001 |       |     |      |
| CD8 <sup>+</sup> T-cells | TCRVβ1    | 4.2                 | 0.0 0.1   | 3.6 0.1  | 36.3 0.1  | 0.0 0.1   | 14.9 1.0  | 0.0 0.0   | 1.7 0.3   | 2.2 1.4            | 28.2 0.2  | 0.0 4.3  |       |    |      |            |       |            |       |     |      |
|                          | TCRVβ2    | 5.4                 | 8.1 1.9   | 2.2 0.4  | 23.3 3.8  | 0.0 0.0   | 5.2 0.6   | 23.1 58.0 | 7.3 16.8  | 5.0 5.7            | 7.4 0.1   | 0.1 1.4  |       |    |      |            |       |            |       |     |      |
|                          | TCRVβ3    | 4.4                 | 0.1 3.7   | 0.0 4.2  | 0.0 0.0   | 0.1 0.1   | 0.0 0.0   | 9.7 0.2   | 19.6 3.1  | 8.0 2.3            | 0.2 4.5   | 0.0 0.0  |       |    |      |            |       |            |       |     |      |
|                          | TCRVβ4    | 1.9                 | 0.0 0.0   | 0.0 0.1  | 0.0 0.0   | 0.0 0.1   | 0.0 0.0   | 0.0 0.0   | 0.0 0.0   | 0.0 0.0            | 0.0 0.0   | 0.0 0.0  |       |    |      |            |       |            |       |     |      |
|                          | TCRVβ5.1  | 3.2                 | 0.0 0.0   | 0.4 11.2 | 1.4 0.0   | 0.0 0.0   | 1.8 0.5   | 0.0 0.0   | 1.2 3.7   | 0.2 0.0            | 0.2 0.1   | 0.0 4.4  |       |    |      |            |       |            |       |     |      |
|                          | TCRVβ5.2  | 1.1                 | 0.2 0.2   | 0.2 0.1  | 0.0 0.0   | 0.0 0.0   | 0.7 0.0   | 0.0 0.0   | 1.2 0.0   | 0.2 0.0            | 0.0 0.0   | 0.0 0.2  |       |    |      |            |       |            |       |     |      |
|                          | TCRVβ5.3  | 0.9                 | 0.1 0.7   | 0.7 0.2  | 4.0 0.0   | 0.0 0.0   | 0.0 0.0   | 0.0 0.0   | 0.0 0.0   | 0.3 2.0            | 0.0 3.5   | 0.0 0.7  |       |    |      |            |       |            |       |     |      |
|                          | TCRVβ7.1  | 3.4                 | 1.1 0.0   | 0.1 0.0  | 0.0 0.0   | 0.0 0.0   | 0.1 0.0   | 0.0 0.0   | 3.2 16.5  | 0.3 0.7            | 0.1 0.1   | 0.0 0.0  |       |    |      |            |       |            |       |     |      |
|                          | TCRVβ7.2  | 2.4                 | 0.1 0.0   | 0.0 0.0  | 0.0 0.0   | 0.0 0.2   | 1.4 0.2   | 0.0 0.0   | 0.1 0.2   | 0.2 0.0            | 0.0 0.5   | 0.0 0.0  |       |    |      |            |       |            |       |     |      |
|                          | TCRVβ8    | 4.1                 | 0.0 0.0   | 3.2 0.0  | 1.3 30.4  | 0.0 0.1   | 0.2 0.0   | 23.2 10.0 | 7.6 1.2   | 6.8 5.7            | 1.1 0.1   | 0.0 0.0  |       |    |      |            |       |            |       |     |      |
|                          | TCRVβ9    | 3.5                 | 0.0 0.1   | 0.0 0.1  | 0.0 0.0   | 0.0 0.0   | 1.6 0.0   | 2.9 0.1   | 3.8 0.0   | 0.4 0.9            | 0.1 0.0   | 0.0 6.5  |       |    |      |            |       |            |       |     |      |
|                          | TCRVβ11   | 0.9                 | 0.2 0.0   | 0.2 0.0  | 0.0 14.8  | 0.2 0.1   | 0.2 0.0   | 0.4 0.3   | 0.8 0.1   | 0.3 0.0            | 0.2 0.5   | 0.2 0.0  |       |    |      |            |       |            |       |     |      |
|                          | TCRVβ12   | 1.3                 | 0.0 0.0   | 0.0 0.1  | 0.0 0.0   | 0.1 0.1   | 0.6 0.0   | 0.0 0.0   | 3.4 0.6   | 2.9 2.9            | 0.0 0.0   | 0.0 0.0  |       |    |      |            |       |            |       |     |      |
|                          | TCRVβ13.1 | 3.4                 | 0.1 0.0   | 0.0 0.0  | 0.0 0.1   | 0.1 0.1   | 0.9 7.2   | 4.9 0.0   | 4.3 1.3   | 1.4 2.3            | 0.1 0.5   | 40.4 1.0 |       |    |      |            |       |            |       |     |      |
|                          | TCRVβ13.2 | 3.3                 | 0.0 0.1   | 0.0 0.1  | 0.0 4.4   | 0.4 0.2   | 0.2 0.0   | 0.0 0.1   | 0.1 0.3   | 1.0 0.7            | 0.0 16.1  | 0.0 2.2  |       |    |      |            |       |            |       |     |      |
|                          | TCRVβ13.6 | 1.6                 | 0.3 16.9  | 0.3 11.8 | 0.4 0.1   | 0.0 0.0   | 2.2 0.1   | 0.2 0.0   | 6.4 0.2   | 0.0 0.2            | 1.1 0.4   | 0.0 1.8  |       |    |      |            |       |            |       |     |      |
|                          | TCRVβ14   | 5.7                 | 25.1 65.6 | 2.3 0.5  | 27.4 0.0  | 46.7 1.0  | 9.0 45.1  | 1.8 0.1   | 0.5 15.9  | 1.5 11.6           | 23.1 0.4  | 27.8 7.5 |       |    |      |            |       |            |       |     |      |
|                          | TCRVβ16   | 0.8                 | 0.0 0.1   | 0.0 0.4  | 1.7 0.0   | 0.0 0.2   | 0.0 0.0   | 0.0 0.1   | 0.5 4.1   | 0.1 0.6            | 14.4 0.3  | 13.3 0.0 |       |    |      |            |       |            |       |     |      |
|                          | TCRVβ17   | 5.1                 | 0.2 0.0   | 0.4 0.1  | 0.0 3.5   | 0.0 0.0   | 7.1 0.3   | 0.1 0.0   | 1.4 2.3   | 5.6 0.1            | 0.3 29.0  | 0.0 47.9 |       |    |      |            |       |            |       |     |      |
|                          | TCRVβ18   | 0.6                 | 0.1 0.0   | 0.1 0.0  | 0.0 0.0   | 0.0 0.0   | 0.0 0.0   | 0.0 0.0   | 0.1 0.0   | 0.0 0.0            | 0.0 0.1   | 0.0 0.0  |       |    |      |            |       |            |       |     |      |
|                          | TCRVβ20   | 2.3                 | 0.1 0.0   | 0.0 0.0  | 0.0 0.0   | 0.0 0.1   | 0.8 0.5   | 0.3 0.0   | 0.0 0.0   | 3.1 3.3            | 0.0 0.0   | 0.0 0.4  |       |    |      |            |       |            |       |     |      |
|                          | TCRVβ21.3 | 2.4                 | 0.0 0.0   | 1.5 0.2  | 0.5 3.0   | 0.0 0.1   | 1.9 0.0   | 1.4 0.7   | 1.0 0.4   | 1.4 0.7            | 18.0 2.8  | 0.0 0.3  |       |    |      |            |       |            |       |     |      |
|                          | TCRVβ22   | 3.2                 | 0.3 0.2   | 0.0 72.7 | 0.0 4.1   | 0.1 0.1   | 7.7 0.3   | 0.0 0.0   | 0.3 1.9   | 0.7 1.3            | 0.5 0.0   | 0.1 0.0  |       |    |      |            |       |            |       |     |      |
|                          | TCRVβ23   | 1.3                 | 0.0 3.0   | 0.3 0.8  | 0.0 0.0   | 0.0 0.0   | 0.3 0.0   | 0.4 0.0   | 0.6 0.2   | 2.8 2.2            | 0.0 0.0   | 0.0 0.0  |       |    |      |            |       |            |       |     |      |
| undetermined             | 33.4      | 63.8 7.6            | 84.3 0.0  | 3.8 35.6 | 52.3 97.4 | 43.2 44.0 | 31.5 30.2 | 35.1 30.8 | 55.7 55.1 | 4.9 40.6           | 17.8 21.4 |          |       |    |      |            |       |            |       |     |      |
|                          |           |                     |           |          |           |           |           |           |           |                    |           |          |       |    |      | r = 0.76   |       | r = 0.65   |       |     |      |
|                          |           |                     |           |          |           |           |           |           |           |                    |           |          |       |    |      | p = 0.0001 |       | p = 0.0007 |       |     |      |
|                          |           |                     |           |          |           |           |           |           |           |                    |           |          |       |    |      | r = 0.45   |       | r = 0.47   |       |     |      |
|                          |           |                     |           |          |           |           |           |           |           |                    |           |          |       |    |      | p = 0.03   |       | p = 0.02   |       |     |      |

**Online Resource 5. Correlation in T-cell receptor variable beta chain protein expression of CD4<sup>+</sup> and CD8<sup>+</sup> T-cells expanded from anatomically distinct white matter lesions of the same MS patient.** Short-term T-cell lines (TCL) were generated by non-specific stimulation of T-cells recovered from paired white matter brain tissues that were histologically classified as normal-appearing white matter (NAWM) and white matter lesions (WML) classes; diffuse white matter abnormalities (DWMA), active lesions (AL), mixed active/inactive lesions (mAIL) and inactive lesions (IL) (see Online Resource 2 for criteria applied for MS WM classification). The T-cell receptor variable beta chain (TCRVβ) protein expression profile was determined for 10 MS patients by flow cytometry using monoclonal antibodies (mAb) directed to 24 distinct human TCRVβ chains for CD4<sup>+</sup> (upper rows) and CD8<sup>+</sup> T-cells (lower rows) of the indicated TCL for each MS patient (column pairs). Light to dark color grading indicate the lowest to highest frequencies of specific TCRVβ expressed by CD4<sup>+</sup> and CD8<sup>+</sup> T-cells in each TCL. The mean TCRVβ chain expression of PB-derived CD4<sup>+</sup> and CD8<sup>+</sup> T-cells from 85 unrelated healthy individuals are provided as reference (data provided by Beckman Coulter). “Undetermined” refers to T-cells expressing a TCRVβ chain not covered by the TCRVβ-specific monoclonal antibody panel used. Spearman’s rank correlation test were used for statistical analysis.
