# Supplementary material for: Phenotypic and functional characterization of T cells in white matter lesions of multiple sclerosis patients
Source: Springer Nature journal article supplement (doi:10.1007/s00401-017-1744-4), 2017-06-17
Supplement: MOESM7 [file 12451212]

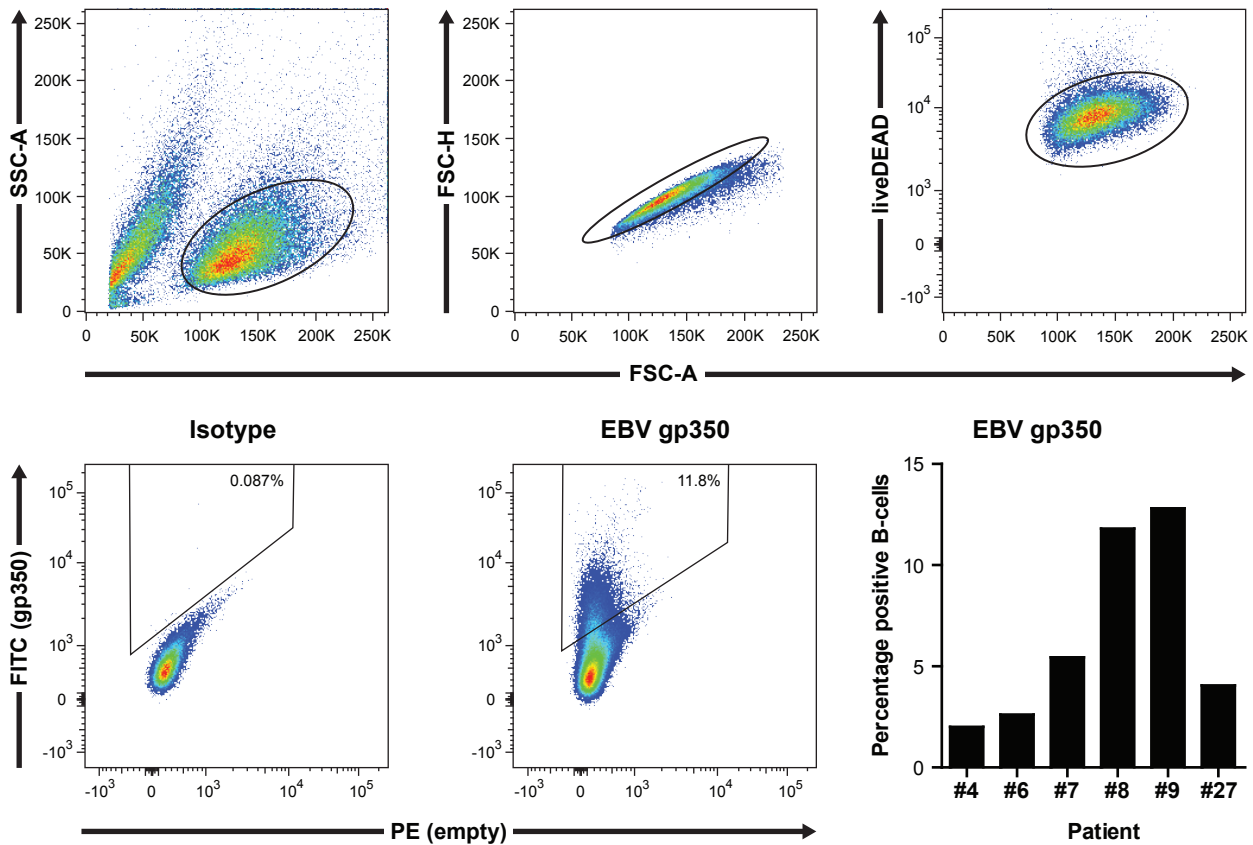

**Online Resource 7. Low frequency of cultured latently Epstein-Barr virus infected human B-cell lines express the viral glycoprotein 350.** Long-term cultured EBV-infected B-cell lines (BLCL) were stained using fluorescent viability marker and a monoclonal antibody (moAb) specific for EBV glycoprotein 350 (gp350), or as control an IgG1 isotype moAb, and staining visualized using a FITC-conjugated rabbit-anti- mouse IgG secondary antibody. EBV-specific glycoprotein 350 is expressed on the cell surface of EBV-infected B-cells undergoing productive virus infection, but not on latently EBV-infected B-cells. Single viable B-cells were gated based on sideward scatter (SSC-A) and forward scatter area (FSC-A) and height (FSC-H), intermediate liveDEAD staining. Gating of donor #8 is shown representative for 6 donors analysed.
